# Supplementary material
Source: PubMed Central journal article supplement (PMC454188)
Supplement: pnas_101_27_10205__1.pdf [file pnas_101_27_10205__1.pdf]

**Table 1. List of genes clustered in Fig. 1D in the main text**

| genes of 'photosynthesis' category clustered in green rectangle            |                                                                                                  |
|----------------------------------------------------------------------------|--------------------------------------------------------------------------------------------------|
| AT1g12900                                                                  | glyceraldehyde 3-phosphate dehydrogenase A, chloroplast precursor, putative                      |
| AT1g32060                                                                  | phosphoribulokinase (EC 2.7.1.19) precursor like protein                                         |
| AT1g42970                                                                  | putative glyceraldehyde-3-phosphate dehydrogenase (At1g42970)                                    |
| AT1g43670                                                                  | fructose 1,6-bisphosphatase, putative                                                            |
| AT1g56190                                                                  | phosphoglycerate kinase, putative                                                                |
| AT1g67090                                                                  | putative ribulose bisphosphate carboxylase, small subunit                                        |
| AT2g21170                                                                  | putative triosephosphate isomerase                                                               |
| AT2g21330                                                                  | fructose bisphosphate aldolase like protein                                                      |
| AT3g26650                                                                  | glyceraldehyde 3-phosphate dehydrogenase A subunit (GapA)                                        |
| AT3g50820                                                                  | putative protein 1 photosystem II oxygen-evolving complex                                        |
| AT3g51820                                                                  | chlorophyll synthetase like protein                                                              |
| AT3g54050                                                                  | fructose-bisphosphatase precursor                                                                |
| AT3g55800                                                                  | sedoheptulose-bisphosphatase precursor                                                           |
| AT3g60750                                                                  | transketolase - like protein                                                                     |
| AT3g61470                                                                  | Lhca2 protein                                                                                    |
| AT4g02770                                                                  | putative photosystem I reaction center subunit II precursor                                      |
| AT4g05180                                                                  | Oxygen-evolving enhancer protein 3 precursor - like protein                                      |
| AT4g10120                                                                  | sucrose-phosphate synthase - like protein                                                        |
| AT4g12800                                                                  | probable photosystem I chain XI precursor                                                        |
| AT4g14890                                                                  | ferredoxin                                                                                       |
| AT4g15530                                                                  | pyruvate,orthophosphate dikinase                                                                 |
| AT4g15560                                                                  | 1-D-deoxyxylulose 5-phosphate synthase, putative                                                 |
| AT4g21280                                                                  | photosystem II oxygen-evolving complex protein 3 - like                                          |
| AT4g28660                                                                  | photosystem II protein W - like                                                                  |
| AT4g32260                                                                  | H <sup>+</sup> -transporting ATP synthase chain 9 - like protein                                 |
| AT5g11450                                                                  | unknown protein                                                                                  |
| AT5g38410                                                                  | ribulose bisphosphate carboxylase small chain 3b precursor (RuBisCO small subunit 3b) (sp:P1079) |
| AT5g38430                                                                  | ribulose bisphosphate carboxylase small chain 1b precursor (RuBisCO small subunit 1b) (sp:P1079) |
| genes of 'pentose-phosphate pathway' clustered in black rectangle          |                                                                                                  |
| AT1g64190                                                                  | 6-phosphogluconate dehydrogenase, putative                                                       |
| AT3g02360                                                                  | 6-phosphogluconate dehydrogenase, putative                                                       |
| AT4g34200                                                                  | Phosphoglycerate dehydrogenase - like protein                                                    |
| AT5g13420                                                                  | transaldolase - like protein                                                                     |
| AT5g40760                                                                  | glucose-6-phosphate dehydrogenase                                                                |
| AT5g41670                                                                  | 6-phosphogluconate dehydrogenase                                                                 |
| genes involved in glucosinolate biosynthesis clustered in yellow rectangle |                                                                                                  |
| AT5g23010                                                                  | 2-isopropylmalate synthase-like; homocitrate synthase-like (MAM-1)                               |
| AT1g16400                                                                  | putative cytochrome P450 (CYP79F2)                                                               |
| AT4g13770                                                                  | cytochrome P450 monooxygenase (CYP83A1)                                                          |
| AT1g24100                                                                  | putative indole-3-acetate beta-glucosyltransferase (S-GT)                                        |

Genes clustered in green, black, and yellow rectangles in Fig. 1D in the main text are shown. Functional classification (“photosynthesis” and “the pentose-phosphate pathway”) was according to MIPS functional category.
