# Supplementary material
Source: PubMed Central journal article supplement (PMC454188)
Supplement: pnas_101_27_10205__2.pdf [file pnas_101_27_10205__2.pdf]

**Table 2. List of metabolites clustered in Fig. 1E in the main text**

---

| <u>glucosinolates clustered in yellow rectangles (abscissa, ordinate)</u> |                                                                                                          |
|---------------------------------------------------------------------------|----------------------------------------------------------------------------------------------------------|
| (17,0-1)                                                                  | 7-methylthioheptylGLS<br>7-methylsulfinyheptylGLS<br>8-methylthiooctylGLS<br>4-methoxyindol-3-ylmetylGLS |
| (20,10)                                                                   | 3-methylsulfinylpropylGLS                                                                                |
| (22,6)                                                                    | 8-methylsulfinyloctylGLS<br>3-indolylmethylGLS                                                           |
| (24,6-8)                                                                  | 4-methylthiobutylGLS<br>4-methylsulfinylbutylGLS                                                         |

---

Glucosinolates clustered in yellow rectangles in Fig. 1E in the main text are shown. The designation (abscissa, ordinate) indicates the position of yellow rectangles in the map.
