# Supplementary material
Source: PubMed Central journal article supplement (PMC454188)
Supplement: pnas_101_27_10205__3.pdf [file pnas_101_27_10205__3.pdf]

**Table 3. List of genes shown in Fig. 3 in the main text**

| abbreviation | AraCyc                                                                  | DART                                                                                       | gene name  | MIPS code | Expression level |
|--------------|-------------------------------------------------------------------------|--------------------------------------------------------------------------------------------|------------|-----------|------------------|
| ATP-PRT      | ATP PHOSPHORIBOSYL TRANSFERASE                                          | ATP phosphoribosyltransferase                                                              |            | AT1g58080 | 1 2 3 4 5 6      |
| AS           | ANTHRANILATE SYNTHASE SUBUNIT B                                         | unknown protein                                                                            |            | AT1g25170 | 1 2 3 4 5 6      |
|              | anthranilate synthase                                                   | anthranilate synthase beta subunit                                                         |            | AT1g25220 | 1 2 3 4 5 6      |
|              | anthranilate synthase                                                   | anthranilate synthase component I precursor (sp P32068)                                    |            | AT5g05730 | 1 2 3 4 5 6      |
| TS           | tryptophan synthase                                                     | tryptophan synthase beta chain                                                             |            | AT5g38530 | 1 2 3 4 5 6      |
| TyrAT        | TYROSINE AMINOTRANSFERASE                                               | putative tyrosine aminotransferase                                                         |            | AT2g24850 | 1 2 3 4 5 6      |
| GHMT         | GLYCINE HYDROXYMETHYLTRANSFERASE                                        | glycine hydroxymethyltransferase like protein                                              |            | AT4g37930 | 1 2 3 4 5 6      |
| AlaAT        | ALANINE AMINOTRANSFERASE                                                | putative alanine aminotransferase                                                          |            | AT1g23310 | 1 2 3 4 5 6      |
| AAT          | ASPARTATE AMINOTRANSFERASE                                              | aspartate aminotransferase (AAT1)                                                          |            | AT2g30970 | 1 2 3 4 5 6      |
| AsnS         |                                                                         | glutamine-dependent asparagine synthetase                                                  |            | AT3g47340 | 1 2 3 4 5 6      |
| MetS         | 5-METHYLtetrahydropteroyltriglutamate--HOMOCYSTEINE S-METHYLTRANSFERASE | 5-methyltetrahydropteroyltriglutamate--homocysteine S-methyltransferase                    |            | AT5g17920 | 1 2 3 4 5 6      |
| NRT          |                                                                         | nitrate transporter                                                                        |            | AT3g21670 | 1 2 3 4 5 6      |
| NR           | nitrate reductase                                                       | nitrate reductase 1 (NR1)                                                                  | Nra1       | AT1g77760 | 1 2 3 4 5 6      |
|              |                                                                         |                                                                                            | Nra2       | AT1g37130 | 1 2 3 4 5 6      |
| GS           |                                                                         | glutamate-ammonia lyase (EC 6.3.1.2) precursor; chloroplast (clone AmbdaAtgs1) (pI 518600) |            | AT5g35630 | 1 2 3 4 5 6      |
|              | GLUTAMINE SYNTHETASE                                                    | glutamine synthetase, putative                                                             |            | AT1g66200 | 1 2 3 4 5 6      |
| GO GAT       |                                                                         | ferredoxin-dependent glutamate synthase                                                    | Fd-GOGAT   | AT5g04140 | 1 2 3 4 5 6      |
| GDH          |                                                                         | glutamate dehydrogenase 2                                                                  | GDH2       | AT5g07440 | 1 2 3 4 5 6      |
|              |                                                                         | glutamate dehydrogenase (EC 1.4.1.-) 1 (pI 571217)                                         |            | AT5g18170 | 1 2 3 4 5 6      |
| ATPS         | ATP sulfurylase                                                         |                                                                                            | APS1       | AT3g22890 | 1 2 3 4 5 6      |
| APSK         |                                                                         | adenosine-5-phosphosulfate-kinase                                                          | akn2       | AT4g39940 | 1 2 3 4 5 6      |
| APR          | APS reductase                                                           | 5'-adenylylphosphosulfate reductase, putative                                              | APR2       | AT1g62180 | 1 2 3 4 5 6      |
|              | APS reductase                                                           | PRH26 protein                                                                              | APR3       | AT4g21990 | 1 2 3 4 5 6      |
| SAT          | serine acetyltransferase                                                | serine acetyltransferase (Sat-1)                                                           | SAT-m      | AT3g13110 | 1 2 3 4 5 6      |
| CS           | CYSTEINE SYNTHASE                                                       | cysteine synthase AtcysC1                                                                  | Bsas3i1    | AT3g61440 | 1 2 3 4 5 6      |
| γECS         | GAMMA-GLUTAMYL CYSTEINE SYNTHETASE                                      | gamma-glutamylcysteine synthetase                                                          |            | AT4g23100 | 1 2 3 4 5 6      |
| fructosidase | BETA-FRUCTOSIDASE                                                       | beta-fructosidase                                                                          |            | AT1g62660 | 1 2 3 4 5 6      |
| HXK          | HEXOKINASE                                                              | hexokinase, putative                                                                       |            | AT1g50460 | 1 2 3 4 5 6      |
| G6PDH        | GLUCOSE-6-PHOSPHATE 1-DEHYDROGENASE                                     | glucose-6-phosphate 1-dehydrogenase, putative                                              |            | AT3g27300 | 1 2 3 4 5 6      |
| PP+PFK       |                                                                         | pyrophosphate-dependent phosphofructo-1-kinase-like protein                                |            | AT4g29220 | 1 2 3 4 5 6      |
| abbase       | FRUCTOSE-BISPHOSPHATE ALDOLASE                                          | putative fructose-bisphosphate aldolase                                                    |            | AT4g38970 | 1 2 3 4 5 6      |
|              | FRUCTOSE-BISPHOSPHATE ALDOLASE                                          | fructose-bisphosphate aldolase - like protein                                              |            | AT4g26530 | 1 2 3 4 5 6      |
|              | FRUCTOSE-BISPHOSPHATE ALDOLASE                                          | putative fructose-bisphosphate aldolase, plastidic form                                    |            | AT2g01140 | 1 2 3 4 5 6      |
|              | FRUCTOSE-BISPHOSPHATE ALDOLASE                                          | putative fructose bisphosphate aldolase                                                    |            | AT2g21330 | 1 2 3 4 5 6      |
| G3PDH        | GLYCERALDEHYDE-3-PHOSPHATE DEHYDROGENASE C                              | glyceraldehyde-3-phosphate dehydrogenase C subunit (GapC)                                  | GAPC       | AT3g04120 | 1 2 3 4 5 6      |
|              | glyceraldehyde-3-phosphate dehydrogenase                                |                                                                                            | GAPB, GAPA | AT1g42970 | 1 2 3 4 5 6      |
|              | glyceraldehyde-3-phosphate dehydrogenase                                | glyceraldehyde 3-phosphate dehydrogenase A subunit (GapA)                                  | GAPB, GAPA | AT3g26650 | 1 2 3 4 5 6      |
|              | GLYCERALDEHYDE-3-PHOSPHATE DEHYDROGENASE                                | glyceraldehyde-3-phosphate dehydrogenase, putative                                         |            | AT1g13440 | 1 2 3 4 5 6      |
| PGK          | PHOSPHOGLYCERATE KINASE                                                 | phosphoglycerate kinase, putative                                                          |            | AT3g12780 | 1 2 3 4 5 6      |
|              | PHOSPHOGLYCERATE KINASE                                                 | phosphoglycerate kinase, putative                                                          | PGK        | AT1g79550 | 1 2 3 4 5 6      |
| aconitase    | ACONITASE HYDRATASE                                                     | cytoplasmatic aconitate hydratase (aconitate hydratase) (aconitase) (EC 4.2.1.3)           |            | AT4g35830 | 1 2 3 4 5 6      |
| 2-O-G DH     | 2-OXOGLUTARATE DEHYDROGENASE                                            | 2-oxoglutarate dehydrogenase, E1 component                                                 |            | AT5g65750 | 1 2 3 4 5 6      |
| MaDH         |                                                                         | mitochondrial NAD-dependent malate dehydrogenase                                           |            | AT1g53240 | 1 2 3 4 5 6      |
| NADP-MaDH    |                                                                         | NADP-dependent malate dehydrogenase                                                        |            | AT5g58330 | 1 2 3 4 5 6      |
| ATP CL       |                                                                         | ATP citrate lyase, putative                                                                |            | AT3g06650 | 1 2 3 4 5 6      |

Annotations given in AraCyc

Pathways of TAIR (The *Arabidopsis* Information Resource; www.arabidopsis.org), DART (the Database for *Arabidopsis* Research and Tools; http://biochem.agr.nagoya-u.ac.jp/atgenome/index.html), and MIPS (Munich Information Center for Protein Sequences) codes are shown. Statistically significant changes in gene expression (SAM, the false discovery rate <10%) are shown in the boxes (1, H-le-S/C; 2, H-le-N/C; 3, H-le-SN/C; 4, H-ro-S/C; 5, H-ro-N/C; 6, H-ro-SN/C) as red (induced) or green (repressed).
